# Supplementary material
Source: Springer Nature journal article supplement (https://www.springermedizin.de/resource/supplementary/12883_2009_285_MOESM2_ESM.pdf/9455140)
Supplement: MOESM2 [file 9455140]

## Experimental design

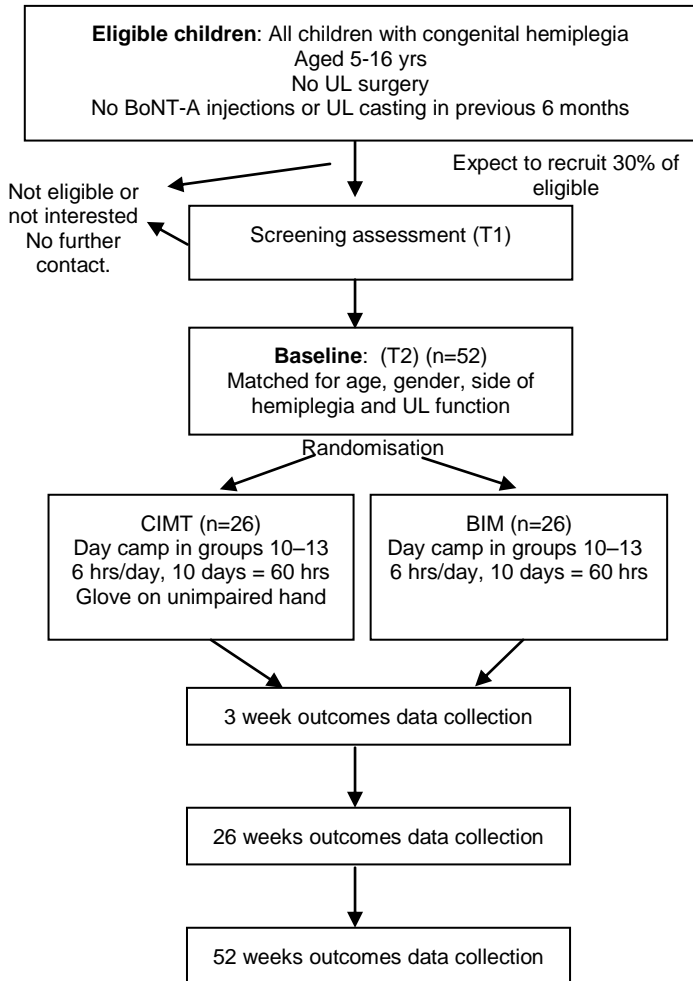

## Outcome measures

### Screening Measures (T1)

MUUL (10 mins)  
AHA (15 mins)  
PA (15 mins)  
CAPE (20-30 mins)  
LIFE-H (1 hour)  
Total assessment time: 1 – 1.25 hours

### Baseline & 52 week measures (T2&T5)

TMS & fMRI  
MUUL  
AHA  
JTTHF (max 15 mins)  
PA  
CAPE  
COPM (15 mins)  
LIFE-H<sup>\*</sup>  
CHIEF<sup>\*</sup>  
Study Questionnaire<sup>\*</sup>  
CPQOL – Adult<sup>\*</sup>  
CPQOL-Child<sup>\*</sup>  
Kidscreen<sup>\*</sup>  
SFA<sup>\*\*</sup>  
<sup>\*</sup> posted to family prior to appointment  
Total assessment time: 1.5 + 1 hours  
<sup>\*\*</sup> Telephone interview with teacher (10 mins)

### 3 and 26 week measures (T3&T4)

TMS & fMRI  
MUUL  
AHA  
JTTHF  
PA  
CAPE  
COPM  
LIFE-H<sup>\*</sup>  
CPQOL-Adult<sup>\*</sup>  
CPQOL-Child<sup>\*</sup>  
Kidscreen<sup>\*</sup>  
SFA<sup>\*\*</sup>  
<sup>\*</sup> posted to family prior to appointment  
Total assessment time: 1.5 hours  
<sup>\*\*</sup> Telephone interview with teacher (10 mins)

Key:-

BoNT-A, Botulinum Toxin A

UL, upper limb

TMS, transcranial magnetic stimulation

fMRI, functional magnetic resonance imaging

AHA, Assisting Hand Assessment

JTTHF, Jebsen Taylor Test of Hand Function

MUUL, Melbourne Assessment of Unilateral Upper Limb Function

PA, Physical Upper Limb Assessment

CAPE, Children's Assessment of Participation and Enjoyment

COPM, Canadian Occupational Performance Measure

LIFE-H, Assessment of Life Habits

PA, physical assessment

SFA, School Function Assessment

CHIEF, Craig Hospital Environmental Inventory

CPQOL- Adult, CP Quality of Life– Adult

CPQOL-Child, CP Quality of Life – Child
